# Supplementary material for: Steady-State Motion Visual Evoked Potential (SSMVEP) Enhancement Method Based on Time-Frequency Image Fusion
Source: Comput Intell Neurosci. 2019 May 21;2019:9439407. doi: 10.1155/2019/9439407 (PMC6556311; doi:10.1155/2019/9439407)
Supplement: Supplementary Materials — MATLAB codes for T-F image fusion, minimum energy fusion, maximum contrast fusion, and CCA fusion. [file 9439407.f1.zip]

Archive with 8 entries (7 files):
- 9439407.f1/MATLAB Code/
- 9439407.f1/MATLAB Code/bandp.m
- 9439407.f1/MATLAB Code/CCA_fusion.m
- 9439407.f1/MATLAB Code/data_test.mat
- 9439407.f1/MATLAB Code/maximum_contrast_fusion.m
- 9439407.f1/MATLAB Code/minimum_energy_fusion.m
- 9439407.f1/MATLAB Code/Readme.txt
- 9439407.f1/MATLAB Code/T_F_image_fusion.m
