# Supplementary material for: Steady-State Motion Visual Evoked Potential (SSMVEP) Enhancement Method Based on Time-Frequency Image Fusion
Source: Comput Intell Neurosci. 2019 May 21;2019:9439407. doi: 10.1155/2019/9439407 (PMC6556311; doi:10.1155/2019/9439407)
Supplement: Supplementary Materials — MATLAB codes for T-F image fusion, minimum energy fusion, maximum contrast fusion, and CCA fusion. [file 9439407.f1.zip › 9439407.f1/MATLAB Code/bandp.m]

 function y=bandp(xsum,f1,f3,fsl,fsh,Fs)
%´øÍ¨ÂË²¨
%Ê¹ÓÃ×¢ÒâÊÂÏî£ºÍ¨´ø»ò×è´øµÄ½ØÖ¹ÆµÂÊÓë²ÉÑùÂÊµÄÑ¡È¡·¶Î§ÊÇ²»ÄÜ³¬¹ý²ÉÑùÂÊµÄÒ»°ë
%¼´£¬f1,f3,fs1,fsh,µÄÖµÐ¡ÓÚ Fs/2
%x:ÐèÒª´øÍ¨ÂË²¨µÄÐòÁÐ
% f 1£ºÍ¨´ø×ó±ß½ç
% f 3£ºÍ¨´øÓÒ±ß½ç
% fs1£ºË¥¼õ½ØÖ¹×ó±ß½ç
% fsh£ºË¥±ä½ØÖ¹ÓÒ±ß½ç
%rp£º±ß´øÇøË¥¼õDBÊýÉèÖÃ
%rs£º½ØÖ¹ÇøË¥¼õDBÊýÉèÖÃ
%FS£ºÐòÁÐxµÄ²ÉÑùÆµÂÊ
% f1=300;f3=500;%Í¨´ø½ØÖ¹ÆµÂÊÉÏÏÂÏÞ
% fsl=200;fsh=600;%×è´ø½ØÖ¹ÆµÂÊÉÏÏÂÏÞ
% rp=0.1;rs=30;%Í¨´ø±ßË¥¼õDBÖµºÍ×è´ø±ßË¥¼õDBÖµ
% Fs=1200;%²ÉÑùÂÊ
%
Wp=[2*(f1)/Fs 2*(f3)/Fs];
        Ws=[2*(fsl)/Fs 2*(fsh)/Fs];
        Rp=0.1;
        Rs=0.5;
        [n1,Wn]=cheb1ord(Wp,Ws,Rp,Rs);
        [b1,a1]=cheby1(n1,Rp,Wn);
        y=filter(b1,a1,xsum);
end
