# Supplementary material for: Steady-State Motion Visual Evoked Potential (SSMVEP) Enhancement Method Based on Time-Frequency Image Fusion
Source: Comput Intell Neurosci. 2019 May 21;2019:9439407. doi: 10.1155/2019/9439407 (PMC6556311; doi:10.1155/2019/9439407)
Supplement: Supplementary Materials — MATLAB codes for T-F image fusion, minimum energy fusion, maximum contrast fusion, and CCA fusion. [file 9439407.f1.zip › 9439407.f1/MATLAB Code/Readme.txt]

@ Author: Wenqiang Yan

data_test.mat is test data. The data format is sampling points*channel*trial. 

The test data contains 20 trials with frequencies of [7 8 9 10 7.2 8.2 9.2 10.2 7.4 8.4 9.4 10.4 7.6 8.6 9.6 10.6 7.8 8.8 9.8 10.8] Hz.

The stimulation duration of each trial is 5-s, and the sampling frequency is 1200 Hz.

Each trial contains six channels: 1.PO7 2.Oz 3.PO8 4.PO3 5.POz 6.PO4
